# Supplementary material for: K/O co-doping and introduction of cyano groups in polymeric carbon nitride towards efficient simultaneous solar photocatalytic water splitting and biorefineries
Source: Royal Society of Chemistry journal article supplement (doi:10.1039/d1gc04323d), 2022-01-01
Supplement: d1gc04323d1.pdf [file d1gc04323d1.pdf]

## Supplementary Material

### **K/O co-doping and introduction of cyano groups in polymeric carbon nitride towards efficient simultaneous solar photocatalytic water splitting and biorefinery**

**Xiaopan Yang,<sup>a#</sup> Jiliang Ma,<sup>a,b,c,d\*#</sup> Shaofei Sun,<sup>a</sup> Zhendong Liu,<sup>a</sup> Runcang Sun<sup>a\*</sup>**

<sup>a</sup> Liaoning Key Lab of Lignocellulose Chemistry and BioMaterials, Liaoning Collaborative Innovation Center for Lignocellulosic Biorefinery, College of Light Industry and Chemical Engineering, Dalian Polytechnic University, Dalian, China, 116034

<sup>b</sup> Guangxi Key Laboratory of Clean Pulp & Papermaking and Pollution Control, College of Light Industrial and Food Engineering, Guangxi University, Nanning, 530004

<sup>c</sup> National Forestry and Grassland Administration Key Laboratory of Plant Fiber Functional Materials, Fuzhou, Fujian, China, 350108

<sup>d</sup> State Key Laboratory of Biobased Material and Green Papermaking, Qilu University of Technology, Shandong Academy of Sciences, Jinan, 250353

\*Corresponding authors' E-mail: [jlma@dlpu.edu.cn](mailto:jlma@dlpu.edu.cn) (Jiliang Ma), and [rcsun3@dlpu.edu.cn](mailto:rcsun3@dlpu.edu.cn) (Runcang Sun), Tel.: +86-0411-86323652; Fax: +86-0411-

## 1. Experimental section

### 1.1 Materials

Xylose ( $C_5H_{10}O_5$ ,  $\geq 99\%$ ), glucose ( $C_6H_{12}O_6$ , 96%), fructose ( $C_5H_{10}O_5$ ,  $\geq 99\%$ ), mannose ( $C_6H_{12}O_6$ , 99%), rhamnose ( $C_6H_{12}O_5 \cdot H_2O$ , 99%), arabinose ( $C_5H_{10}O_5$ , 98%), benzoquinone (BQ), ethylenediaminetetraacetic acid (EDTA), isopropyl (IPA), tryptophan (TRP) and chloroplatinic acid hexahydrate ( $>99\%$ ,  $H_2PtCl_6 \cdot 6H_2O$ ) were all purchased from Aladdin Chemistry Co. Ltd (Shanghai, China). Anhydrous ethanol was purchased from Tianjin Kermio Chemical Reagent Co., Ltd. Potassium hydroxide (KOH) was obtained from Sinopharm Chemical Reagent Co., Ltd. All solutions were prepared from ultrapure (Milli-Q) water. All the chemicals and solvents were analytical grade.

### 1.2 Characterization

The equipment used for characterization is introduced in detail, namely scanning electron microscope (SEM), transmission electron microscopes (TEM), Brunauer-Emmett-Teller (BET), powder x-ray diffraction (XRD), Fourier infrared (FT-IR), x-ray photoelectron energy spectrometer (XPS), ultraviolet-visible diffuse reflectance spectrometer (UV-vis DRS), Mott-Schottky (M-S), ultraviolet photoelectron spectroscopy (UPS), transient photocurrent responses, electrochemical impedance spectroscopy (EIS), photoluminescence (PL), electron spin-resonance (ESR), Same as previous reports [1,2].

## 2. Results and discussion

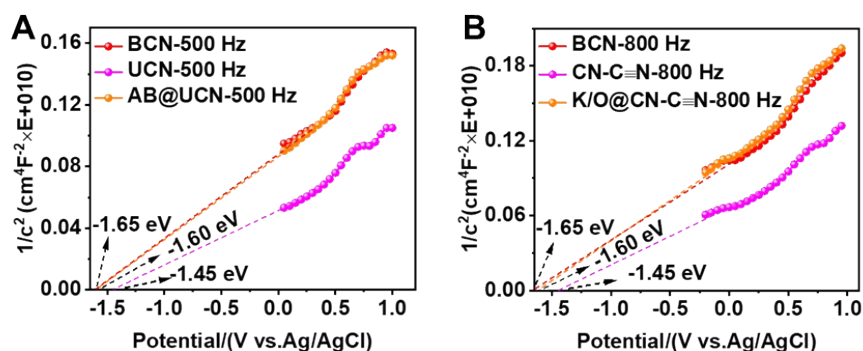

**Fig. S1** Mott-Schottky plots of BCN, CN-C≡N and K/O@CN-C≡N at frequencies of

500 Hz (A) and 800 Hz (B) in 0.5 M Na<sub>2</sub>SO<sub>4</sub>.

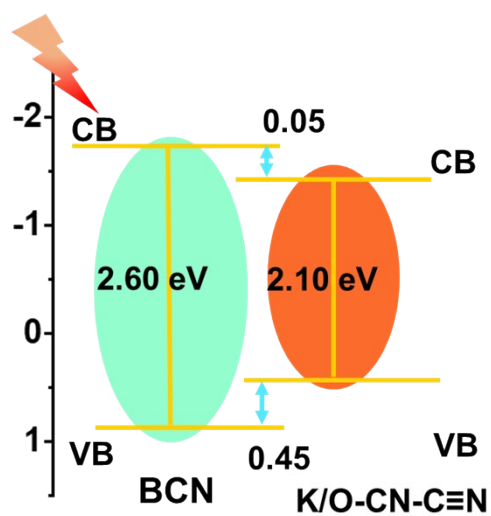

**Fig. S2** Relative band alignment of BCN and K/O@CN-C≡N.

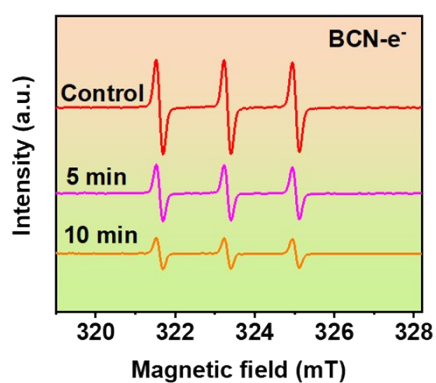

**Fig. S3** TEMPO ESR spin-labeling for e<sup>-</sup>.

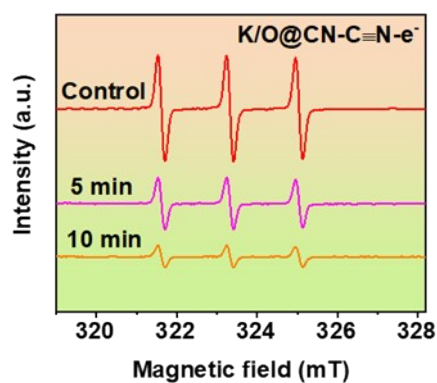

**Fig. S4** TEMPO ESR spin-labeling for e<sup>-</sup>.

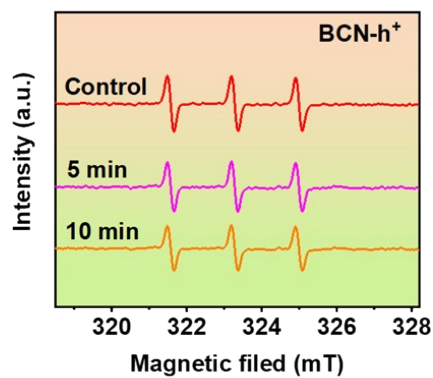

Fig. S5 TEMPO ESR spin-labeling for h<sup>+</sup>.

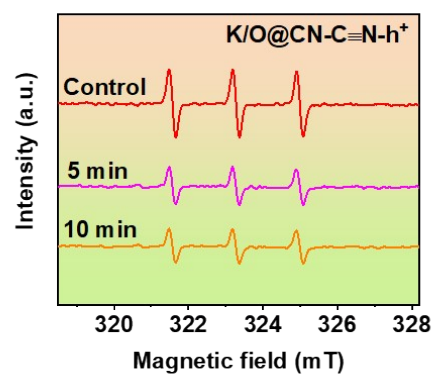

Fig. S6 TEMPO ESR spin-labeling for h<sup>+</sup>.

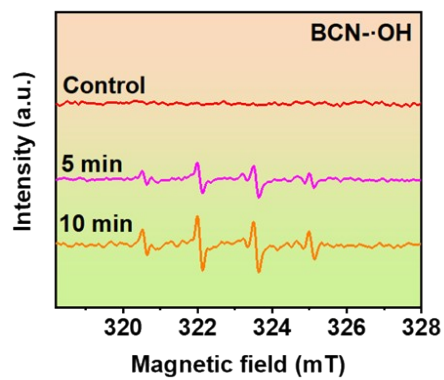

Fig. S7 DMPO ESR spin-labeling for ·OH.

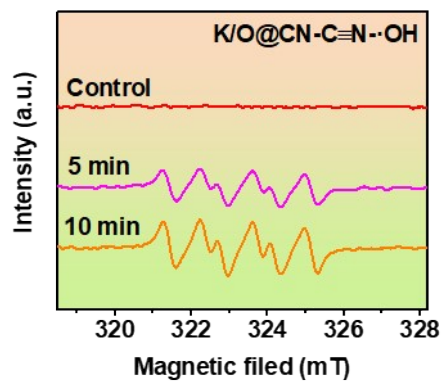

Fig. S8 DMPO ESR spin-labeling for  $\cdot\text{OH}$ .

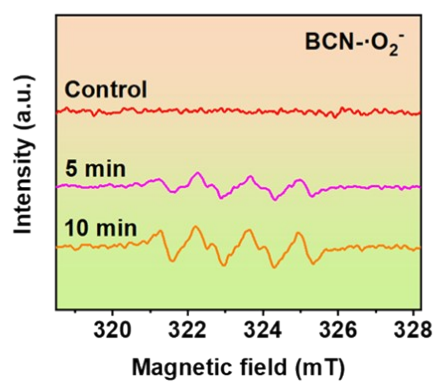

Fig. S9 DMPO ESR spin-labeling for  $\cdot\text{O}_2^-$ .

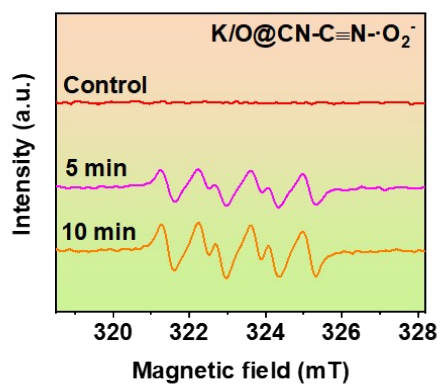

Fig. S10 DMPO ESR spin-labeling for  $\cdot\text{O}_2^-$ .

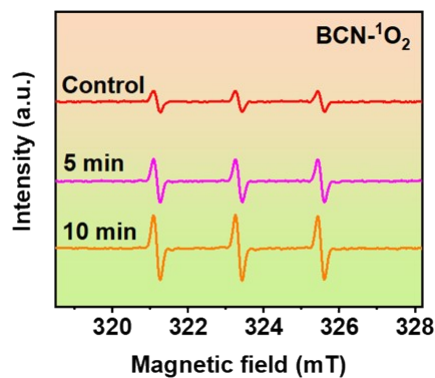

Fig. S11 TEMPONE ESR spin-labeling for  $^1\text{O}_2$ .

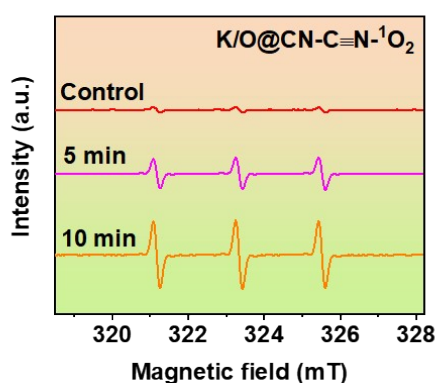

Fig. S12 TEMPONE ESR spin-labeling for  $^1\text{O}_2$ .

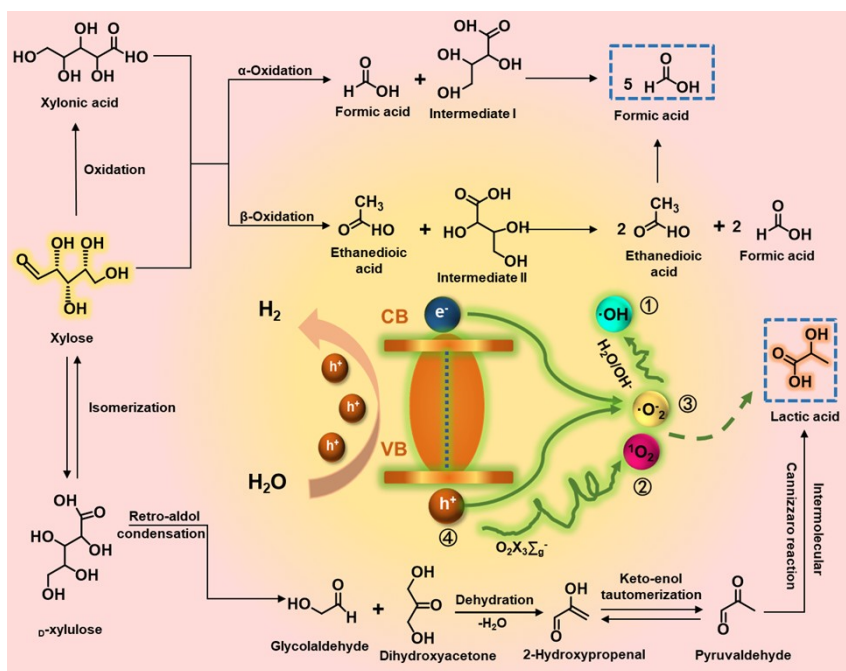

Fig. S13 Possible reaction pathway for the conversion of xylose photocatalyzed by  $\text{K/O@CN-C}\equiv\text{N}$  under visible-light irradiation.

**Table S1** The effects of different catalysts on hydrogen production under different conditions were studied.

| Entry | Photocatalysis                   | Hydrogen evolution rate<br>( $\mu\text{mol}\cdot\text{h}^{-1}\cdot\text{g}^{-1}$ ) | References |
|-------|----------------------------------|------------------------------------------------------------------------------------|------------|
| 1     | K/O@CN-C $\equiv$ N <sup>a</sup> | 33380                                                                              | This word  |
| 2     | Nic-CN                           | 6310                                                                               | 3          |
| 3     | NMS/SCN                          | 658.5                                                                              | 4          |
| 4     | K-Na-CCN                         | 1380.1                                                                             | 5          |
| 5     | UCN                              | 590                                                                                | 6          |

Reaction conditions: <sup>a</sup> 0.8 mL H<sub>2</sub>PtCl<sub>6</sub>, 6 h; <sup>b</sup> 1 wt% Pt, 1 h; <sup>c</sup> 10 mL triethanolamine, 4 h; <sup>d</sup> 3 wt%, 4 h; <sup>f</sup> 3 wt% Pt, 6 h.

**Table S2** The effects of different catalysts on synthesis of lactic acid at various conditions.

| Entr<br>y | Sample  | Thermo-<br>catalysis | Photocatalysis                                         | Conversion<br>(%) | Yield<br>(%) | References |
|-----------|---------|----------------------|--------------------------------------------------------|-------------------|--------------|------------|
| 1         | Xylose  |                      | K/O@CN-<br>C $\equiv$ N <sup>a</sup>                   | 95.0              | 86.6         | This work  |
| 2         |         |                      | CuO@CS-H <sup>b</sup>                                  | 100.0             | 81.6         | 7          |
| 3         |         |                      | B@mCN <sup>c</sup>                                     | 99.9              | 79.1         | 2          |
| 4         |         |                      | Sn- $\beta$ <sup>d</sup>                               | -                 | 70.0         | 8          |
| 5         |         |                      | ZrO <sub>2</sub> <sup>e</sup>                          | -                 | 42.0         | 9          |
| 6         |         |                      | LaCoO <sub>3</sub> <sup>f</sup>                        | -                 | 37.9         | 10         |
| 7         | Glucose |                      | K/O@CN-<br>C $\equiv$ N <sup>a</sup>                   | 88.0              | 63.6         | This work  |
| 8         |         |                      | CuO@CS-H <sup>b</sup>                                  | 98.2              | 54.2         | 7          |
| 9         |         |                      | Na <sub>2</sub> O <sub>5</sub><br>Nanorod <sup>g</sup> | 99.0              | 39.0         | 11         |
| 10        |         |                      | Sn-Beta-<br>NH <sub>2</sub> <sup>h</sup>               | 99.9              | 56.0         | 12         |

Reaction conditions: <sup>a</sup> 30 °C, 6 h; <sup>b</sup> 60.0 °C, 90.0 min; <sup>c</sup> 60 °C, 90 min; <sup>d</sup> 200 °C, 60 min; <sup>e</sup> 200 °C, N<sub>2</sub>: 24 MPa 40 min; <sup>f</sup> 200 °C, N<sub>2</sub>: 200 psi, 1 h; <sup>g</sup> 250 °C, 4 h; <sup>h</sup> 190.0 °C, 120 min.

## References

- 1 J. L. Ma, D. N. Jin, Y. C. Li, D. Q. Xiao, G. J. Jiao, Q. Liu, Y. Z. Guo, L. P. Xiao, X. H. Chen, X. Z. Li, J. H. Zhou and R. C. Sun, *Appl. Catal. B-Environ.*, 2021, **83**, 119520.
- 2 J. L. Ma, Y. C. Li, D. N. Jin, Z. Ali, G. J. Jiao, J. Q. Zhang, S. Wang and R. C. Sun, *Green Chem.*, 2020, **22**, 6384-6392.
- 3 Q. Li, L.M. Zhang, J.N. Liu, J. Zhou, Y.Q. Jiao, X.D. Xiao, C. Zhao, Y. Zhou and S. Ye, *Small*, 2021, **17**, 2006622.
- 4 Y. L. Chen, F. Y. Su, H. Q. Xie, R. P. Wang, C. H. Ding, J. D. Huang, Y. X. Xu and L. Q. Ye, *Chem, Eng. J.*, 2021, **404**, 126498.
- 5 Z. H. Liao, C. X. Li, Z. Shu, J. Zhou, T. T. Li, W. B. Wang, Z. L. Zhao, L. Xu, L. L. Shi and L. L. Feng, *Int. J. Hydrogen Energ.*, 2021, **46**, 26318-26328.
- 6 V. W. Lau, I. Moudrakovski, T. Botari, S. Weinberger, M. B. Mesch, V. Duppel, J. Senker, V. Blum and B. V. Lotsch, *Nat Commun.* 2016, **7**, 12165.
- 7 Y. C. Li, J. L. Ma, D. N. Jin, G. J. Jiao, X. P. Yang, K. N. Liu, J. H. Zhou and R. C. Sun, *Appl. Catal. B-Environ.*, 2021, **291**, 120123.
- 8 Y. F. Zhang, H. Luo, L. Z. Kong, X. P. Zhao, G. Miao, L. J. Zhu, S. G. Li and Y. H. Sun, *Green Chem.*, 2020, **22**, 7333-7336.
- 9 L. S. Yang, J. Su, S. Carl, J.G. Lynam, X. K. Yang and H. F. Lin, *Appl. Catal. B-Environ.*, 2015, **162**, 149-157.
- 10 X. K. Yang, L. Yang, W. Fan and H. F. Lin, *Catal. Today*, 2016, **269**, 56-64.
- 11 D. Cao, W. J. Cai, W. T. Tao, S. Y. Zhang, D. Z. Wang and D. Z. *Catal. Lett.*, 2017, **147**, 926–933.



- 12 Z. Shen, L. Kong, W. Zhang, M. Y. Gu, M. Xia, X. F. Zhou and Y. L. Zhang, *RSC Adv.*, 2019, **9**, 18989–18995.
